# Supplementary material for: Ionic liquid-immobilized catalytic system for biomimetic dihydroxylation of olefins
Source: Royal Society of Chemistry journal article supplement (doi:10.1039/b403333g), 2004-01-01
Supplement: b403333g.doc [file b403333g.doc]

**Supporting Information**

**Ionic Liquid-Immobilized Catalytic System for Biomimetic Dihydroxylation of Olefins**

Adam Closson, Mikael Johansson and Jan-E. Bäckvall*

*Department of Organic Chemistry, Arrhenius Laboratory, Stockholm University,*

*SE-10691 Stockholm, Sweden*

jeb@organ.su.se

**General Methods**

1H and 13C NMR spectra were recorded on a Varian Unity 400 (400 MHz 1H, 100 MHz 13C) or a Varian Unity 300 (300 MHz 1H, 75 MHz 13C) spectrometer. Chemical shifts (*δ*) are reported in ppm, using residual solvent as internal standard. Millipore Matrex silica gel (60 Å pore size, 35 - 70 *µ*m) was used for flash chromatography. Potassium osmate and tetraethylammonium acetate (TEAA) were purchased from Aldrich. Butylmethyl imidazolium hexafluorophosphate ([bmim]PF6) was purchased from Acros. Flavin **1** was synthesized according to a published procedure.1 All other olefins were obtained from commercial suppliers and used without further purification.

**Representative Procedure for Dihydroxylation of Olefins** (Table 1, all entries): [bmim]PF6 (0.5 mL) was placed in a 50 mL round bottom flask with a small stir bar. K2OsO4 (7.2 mg, 0.02 mmol, 1 mol%), dimethylamino pyridine (DMAP) (2.6 mg, 0.022 mmol, 1.1 mol%), and TEAA (189 mg, 1 mmol) were added and dissolved by gentle stirring. Acetone (1 mL) and water (0.25 mL) were introduced, followed by *N*-methyl morpholine (NMM) (28 *µ*L, 0.24 mmol 12 mol%) and olefin (2 mmol). Flavin **1** (16 mg, 0.06 mmol 3 mol%) was then dissolved in the reaction mixture. Hydrogen peroxide solution (300 *µ*L, 30% solution, 1.5 equivalents) was added over 1.5 h via syringe pump. The reaction mixture was allowed to stir for a further 1.5 h, and the volatile solvents were removed under reduced pressure. The resulting residue of [bmim]PF6 was then extracted three times with 15 mL portions of diethyl ether. The ether layers were combined, and reduced in volume to yield the crude diol as a light yellow to colorless oil. The crude diol was chromatographed on silica gel with 1:1 EtOAc/pentane to yield the purified product.

**Recycling and Reuse of Ionic Liquid-Immobilized Catalytic System** (Table 2, runs 2-5): Acetone (1 mL) and water (0.25 mL) were added to the ionic liquid layer from the first reaction, followed by 2 mmol of olefin. Hydrogen peroxide (300 *µ*L, 30% solution, 1.5 equivalents) was added over 1.5 h. After a further 1.5 h stirring, the volatile solvents were removed, and the remaining ionic liquid was extracted three times with 15 mL portions of diethyl ether. The ether layers were combined and reduced in volume, and the resulting crude product was chromatographed on silica gel with 1:1 EtOAc/pentane to yield purified diol. The subsequent reaction runs 3-5 were carried out in exactly the same manner as described here.

**1-Phenyl-1,2-ethanediol.**21H NMR (CDCl3, 300 MHz): *δ*7.34-7.26 (m, 5 H), 4.77 (dd, *J* = 8, 3 Hz, 1 H), 3.66 (m, 2 H), 3.38 (2 H). 13C NMR (CDCl3, 75 MHz): *δ* 140.39, 128.46, 127.91, 126.03, 74.67, 67.95.

**2-Phenyl-1,2-propanediol.**21H NMR (CDCl3, 400 MHz): *δ* 7.45-7.28 (m, 5H), 3.76 (d, 2H, *J* = 11 Hz), 3.60 (d, 2H, *J* = 11 Hz), 2.6 (br s, 2H), 1.51 (s, 3H). 13C NMR (CDCl3, 100 MHz): *δ* 144.92, 128.34, 127.08, 125.03, 74.79, 70.94, 25.93.

***cis*-1,2-Cyclohexanediol.**31H NMR (CDCl3, 400 MHz): *δ* 3.75-3.73 (m, 2H), 3.03 (br s, 2H), 1.76-1.69 (m, 2H), 1.63-1.49 (m, 4H), 1.32-1.23 (m, 2H). 13C NMR (CDCl3, 100 MHz): *δ* 70.59, 29.78, 21.38.

**2,3-Octanediol.**41H NMR (CDCl3, 300 MHz): *δ* 3.58 (p, 1H, *J* = 6 Hz), 3.22 (m, 1H), 2.39 (br s, 2H), 1.49-1.24 (m, 8H), 1.17 (d, 3H, *J* = 6 Hz), 0.88 (t, 3H, *J* = 7 Hz). 13C NMR (CDCl3, 75 MHz): *δ* 76.21, 70.88, 33.30, 32.83, 25.20, 22.56, 19.48, 13.99.

**1-Phenyl-1,2-propanediol.**51H NMR (CDCl3, 300 MHz): *δ* 7.3-7.27 (m, 5H), 4.28 (d, 1H, *J* = 7 Hz), 3.79 (p, 1H, *J* = 7 Hz), 2.42 (br s, 2H), 0.96 (d, 3H, *J* = 7 Hz). 13C NMR (CDCl3, 75 MHz): *δ* 141.01, 128.29, 127.87, 126.85, 79.34, 72.03, 18.65.

**3-Phenoxy-1,2-propanediol.**61H NMR (CDCl3, 300 MHz): *δ*7.29-7.24 (t, 2 H), 6.97-6.85 (m, 3 H), 4.10 (m, 1 H), 4.00 (d, 2 H), 3.77 (m, 2 H), 3.30 (2 H). 13C NMR (CDCl3, 75 MHz): d 158.33, 129.50, 121.22, 114.48, 70.47, 68.91, 63.62.

**References**

(1) Bergstad, K.; Bäckvall, J.-E. *J. Org. Chem*. **1998**, *63*, 6650-6655.

(2) Döbler, C.; Mehltretter, G. M.; Sundermeier, U.; Beller, M. *J. Am. Chem. Soc*.

**2000**, *122*, 10289-10297.

(3) Nagayama, S.; Endo, M.; Kobayashi, S. *J. Org. Chem*. **1998**, *63*, 6094-6095.

(4) Kroutil, W.; Mischitz, M.; Faber, K. *J. Chem. Soc., Perkin Trans. 1*, **1997**, 3629-

3636.

(5) Choudary, B. M.; Chowdari, N. S.; Madhi, S.; Kantam M. L. *J. Org. Chem*. **2003**,

*68*, 1736-1746.

(6) Egri, G.; Kolbert, A.; Bálint, J.; Fogassy, E.; Novák, L.; Poppe, L. *J. Mol. Catal.*

*B: Enzymatic*, **2000**, *6*, 583-596.
